# Supplementary material
Source: publisher figshare collection journal article supplement (https://karger.figshare.com/ndownloader/files/13747274)
Supplement: Supplementary file 1 [file 13747274]

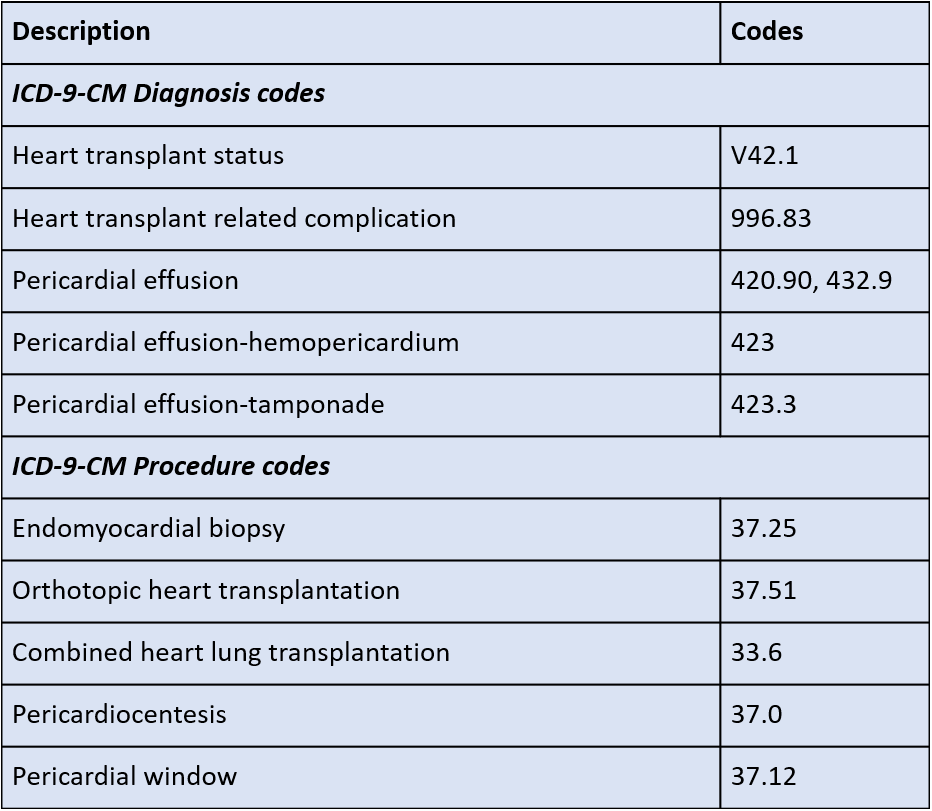


**Supplemental table 1: International Classification of Diseases, Ninth Revision,**

**Clinical Modification [ICD-9-CM] codes**
